# Supplementary material for: Preparation of solid–solution type Fe–Co nanoalloys by synchronous deposition of Fe and Co using dual arc plasma guns
Source: Royal Society of Chemistry journal article supplement (doi:10.1039/c5dt02815a), 2015-01-01
Supplement: c5dt02815a1.pdf [file c5dt02815a1.pdf]

## Electronic Supplementary Information (ESI)

### Preparation of solid-solution-type Fe–Co nanoalloys by synchronous deposition of Fe and Co using dual arc plasma guns

Masaaki Sadakiyo,<sup>a,b</sup> Minako Heima,<sup>a,b</sup> Tomokazu Yamamoto,<sup>c</sup> Syo Matsumura,<sup>c</sup> Masashi Matsuura,<sup>d</sup>  
Satoshi Sugimoto,<sup>d</sup> Kenichi Kato,<sup>b,e</sup> Masaki Takata,<sup>e</sup> and Miho Yamauchi<sup>\*a,b,f</sup>

<sup>a</sup> *International Institute for Carbon-Neutral Energy Research (WPI-I2CNER), Kyushu University, 744 Moto-oka, Nishi-ku, Fukuoka 819-0395, Japan.* <sup>b</sup> *Core Research for Evolutional Science and Technology (CREST), Japan Science and Technology Agency (JST), 7 Goban-cho, Chiyoda-ku, Tokyo 102-0076, Japan.* <sup>c</sup> *Department of Applied Quantum Physics and Nuclear Engineering, Kyushu University, 744 Moto-oka, Nishi-ku, Fukuoka 819-0395, Japan.* <sup>d</sup> *Department of Materials Science, Graduate School of Engineering, Tohoku University, 6-6-02 Aramaki Aza Aoba, Aoba-ku, Sendai 980-8579, Japan.* <sup>e</sup> *RIKEN SPring-8 Center, 1-1-1 Kouto, Sayo-cho, Sayo-gun, Hyogo 679-5148, Japan.* <sup>f</sup> *Department of Chemistry, Faculty of Science, Kyushu University, 6-10-1 Hakozaki, Higashi-ku, Fukuoka 812-8581, Japan*

E-mail: yamauchi@i2cner.kyushu-u.ac.jp

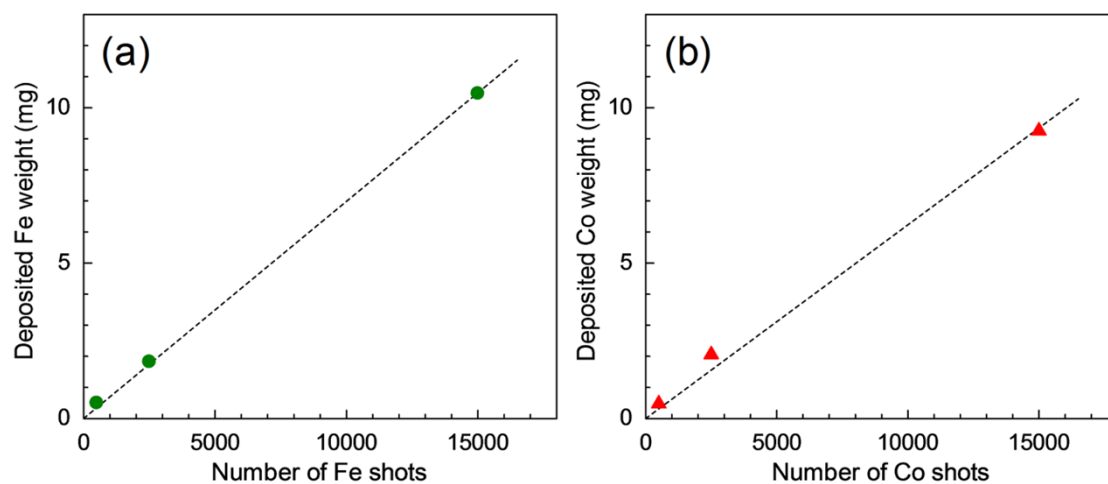

**Fig. S1** Deposited metal weight vs. number of shots of (a) Fe and (b) Co sources, estimated by ICP-AES measurements.

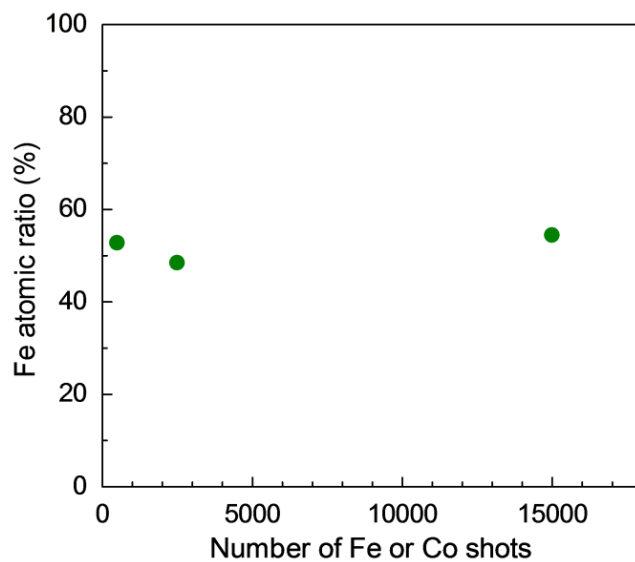

**Fig. S2** Fe atomic ratio vs. number of shots of Fe (or Co), determined by ICP-AES measurements.

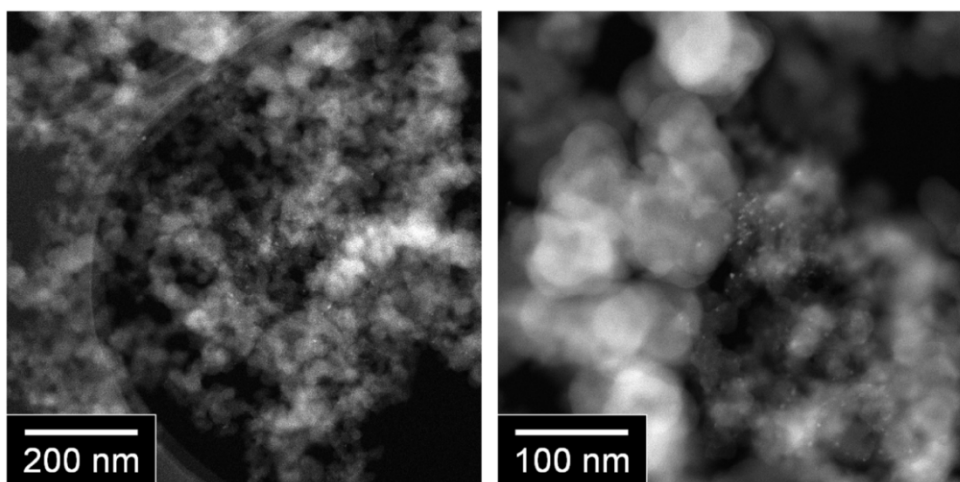

**Fig. S3** Low magnification HAADF-STEM images of  $\text{FeCo}^{5000}$ . Small white dots correspond to the deposited FeCo particles. There also exist bare surface of carbon supports.

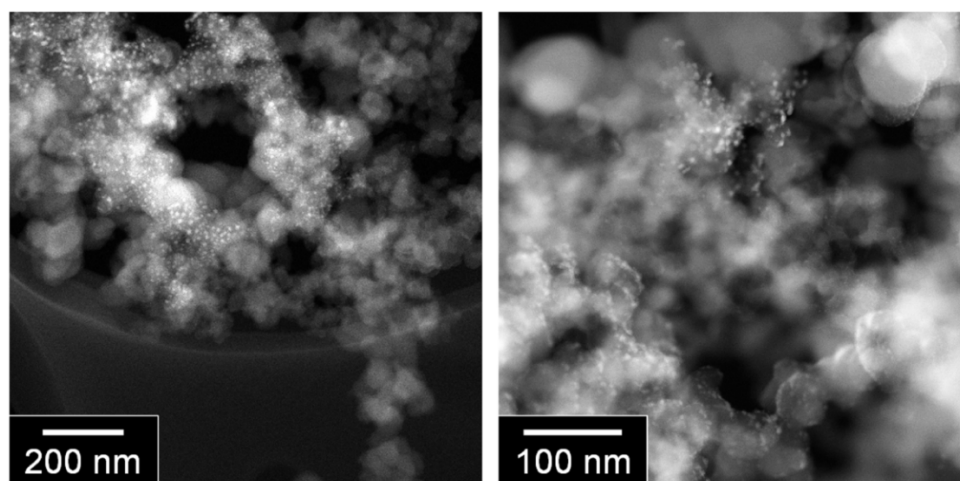

**Fig. S4** Low magnification HAADF-STEM images of  $\text{FeCo}^{3000}$ . Small white dots correspond to the deposited FeCo particles. There also exist bare surface of carbon supports.

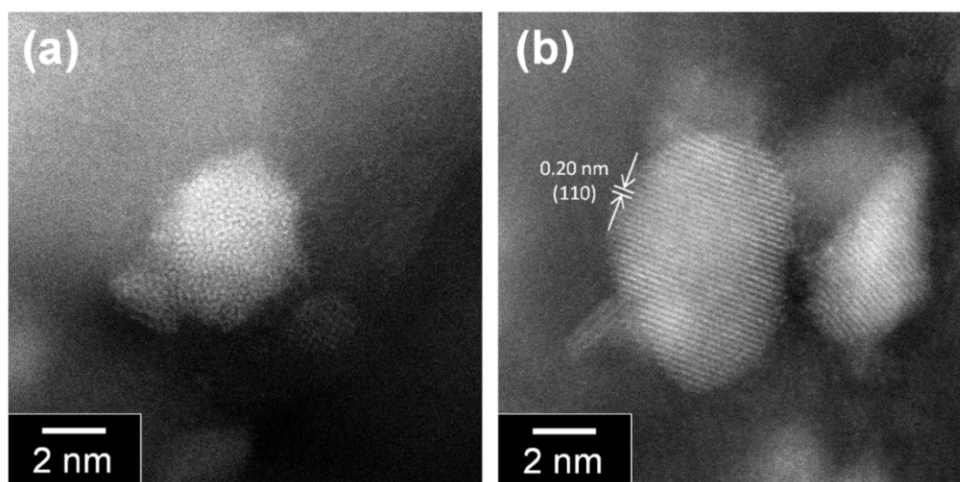

**Fig. S5** HR-STEM images of (a)  $\text{FeCo}^{5000}$  and (b)  $\text{FeCo}^{30000}$ .

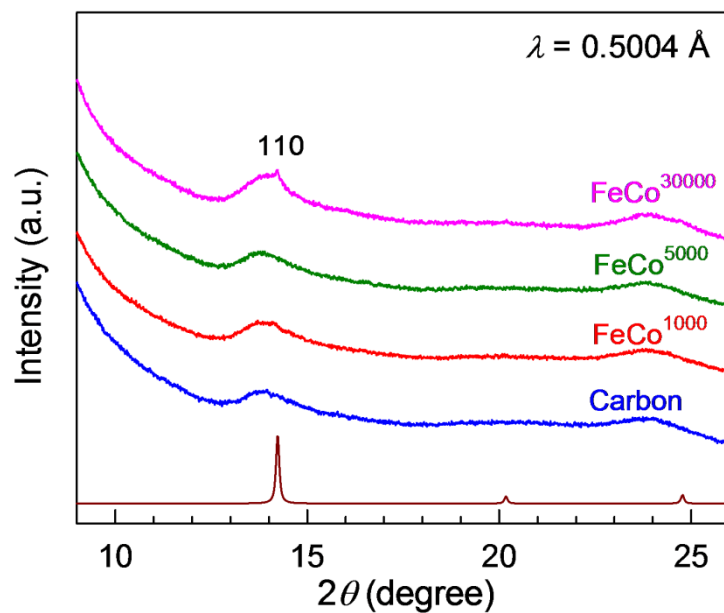

**Fig. S6** XRPD patterns of a simulation of B2-structured Fe–Co alloy (brown), carbon support (blue),  $\text{FeCo}^{1000}$  (red),  $\text{FeCo}^{5000}$  (green), and  $\text{FeCo}^{30000}$  (pink).

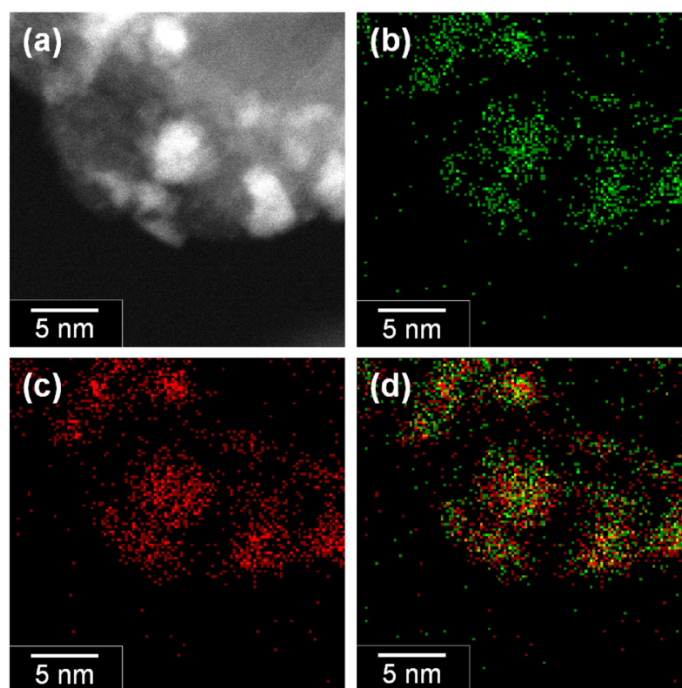

**Fig. S7** (a) HAADF–STEM image of grains of  $\text{FeCo}_{5000}$ . STEM–EDX map of (b) Fe-K and (c) Co-K signals. (d) overlap image of Fe-K and Co-K signals. Green and red correspond to Fe-K and Co-K signals, respectively.

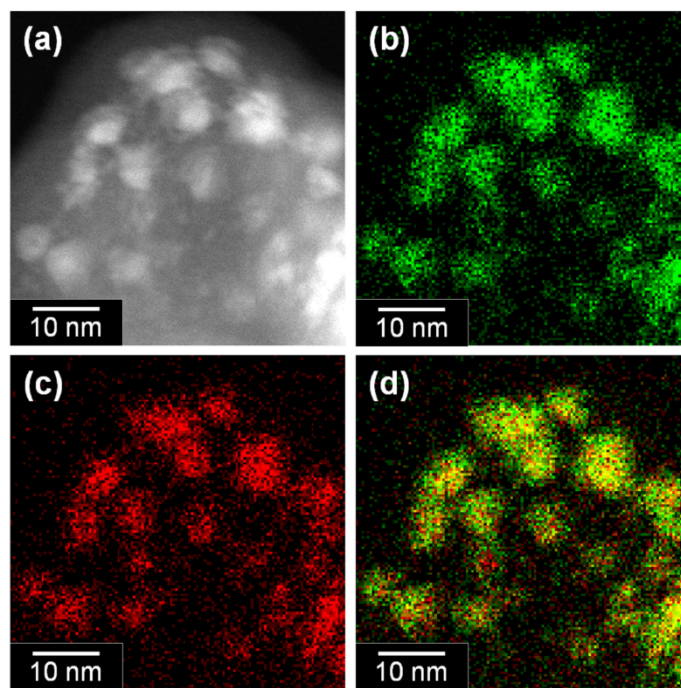

**Fig. S8** (a) HAADF-STEM image of grains of  $\text{FeCo}^{3000}$ . STEM-EDX map of (b) Fe-K and (c) Co-K signals. (d) overlap image of Fe-K and Co-K signals. Green and red correspond to Fe-K and Co-K signals, respectively.

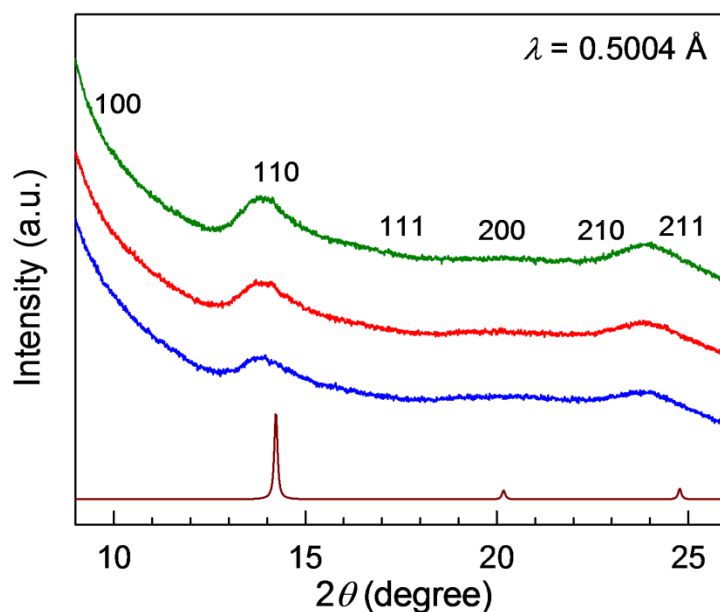

**Fig. S9** XRPD patterns of a simulation of B2-structured Fe-Co alloy (brown), carbon support (blue), as-prepared  $\text{FeCo}^{1000}$  (red), and  $\text{FeCo}^{1000}$  treated at 800 °C under 5%  $\text{H}_2/\text{Ar}$  gas flow (green).

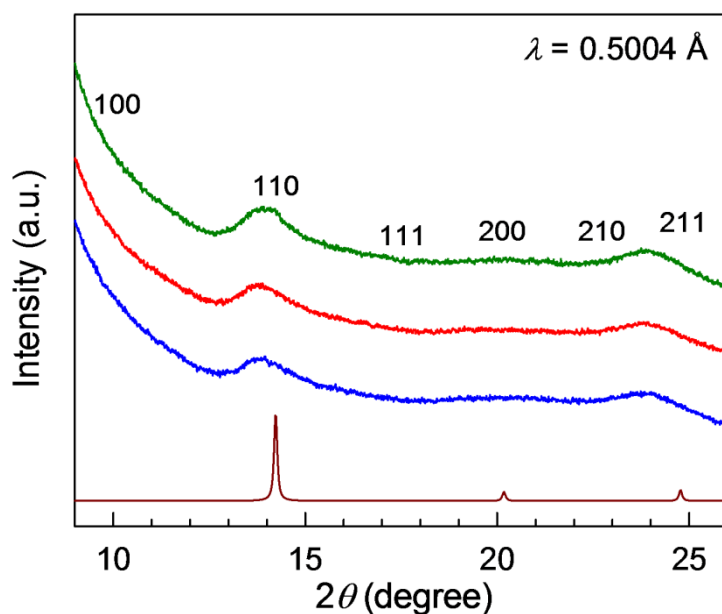

**Fig. S10** XRPD patterns of a simulation of B2-structured Fe-Co alloy (brown), carbon support (blue), as-prepared  $\text{FeCo}^{5000}$  (red), and  $\text{FeCo}^{5000}$  treated at 800 °C under 5%  $\text{H}_2/\text{Ar}$  gas flow (green).

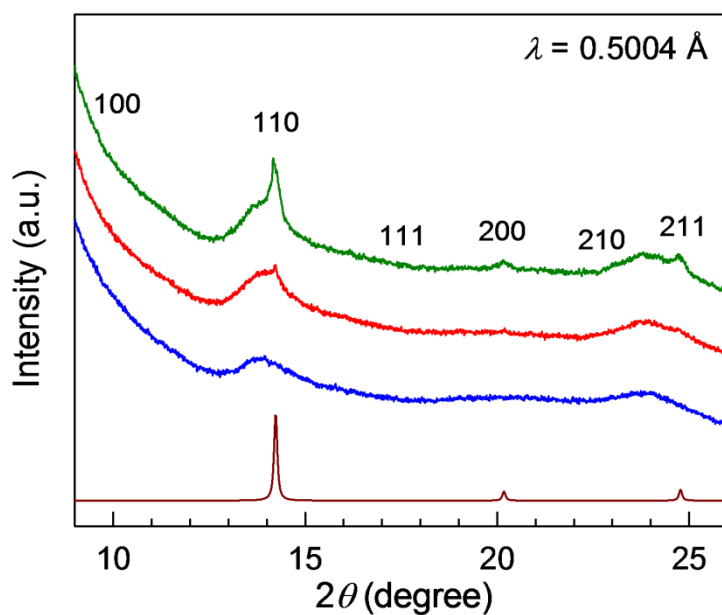

**Fig. S11** XRPD patterns of a simulation of B2-structured Fe-Co alloy (brown), carbon support (blue), as-prepared  $\text{FeCo}^{30000}$  (red), and  $\text{FeCo}^{30000}$  treated at 800 °C under 5%  $\text{H}_2/\text{Ar}$  gas flow (green).

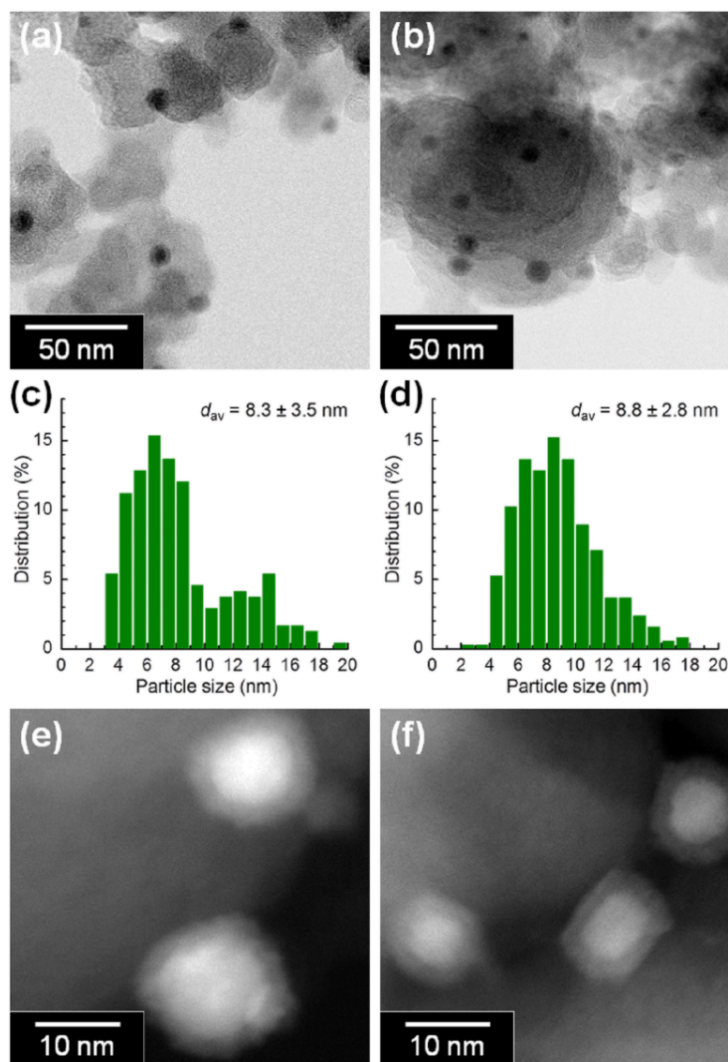

**Fig. S12** STEM images of (a) FeCo<sup>5000</sup> and (b) FeCo<sup>30000</sup> after hydrogen treatment at 800 °C under H<sub>2</sub>/Ar mixed gas flow. Particle size distributions of (c) FeCo<sup>5000</sup> and (d) FeCo<sup>30000</sup>. HAADF-STEM images of (e) FeCo<sup>5000</sup> and (f) FeCo<sup>30000</sup> after the hydrogen treatment.

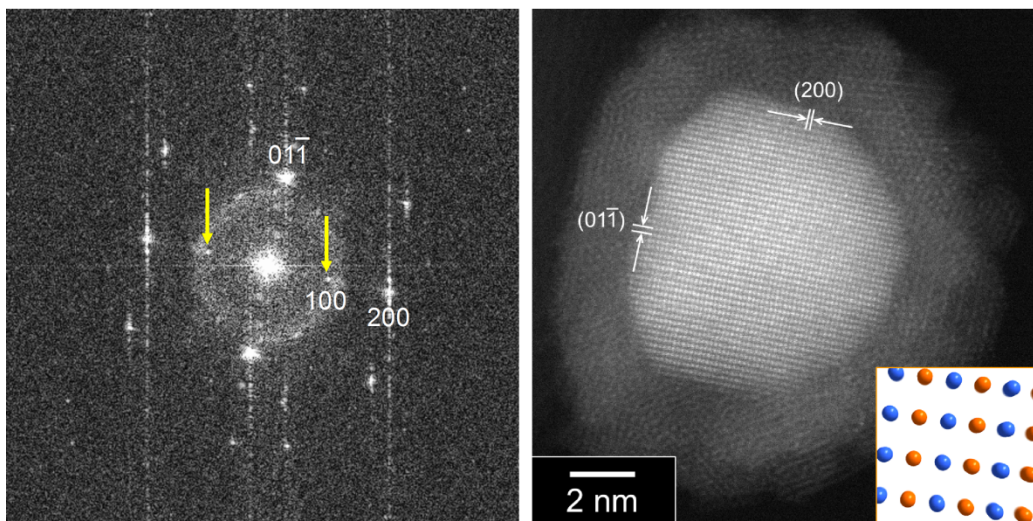

**Fig. S13** (left) A magnified FFT image of (right) the HR-STEM image of  $\text{FeCo}^{5000}$ . The yellow arrows indicate the characteristic spots of ordered B2 structure (e.g. (100) plane).

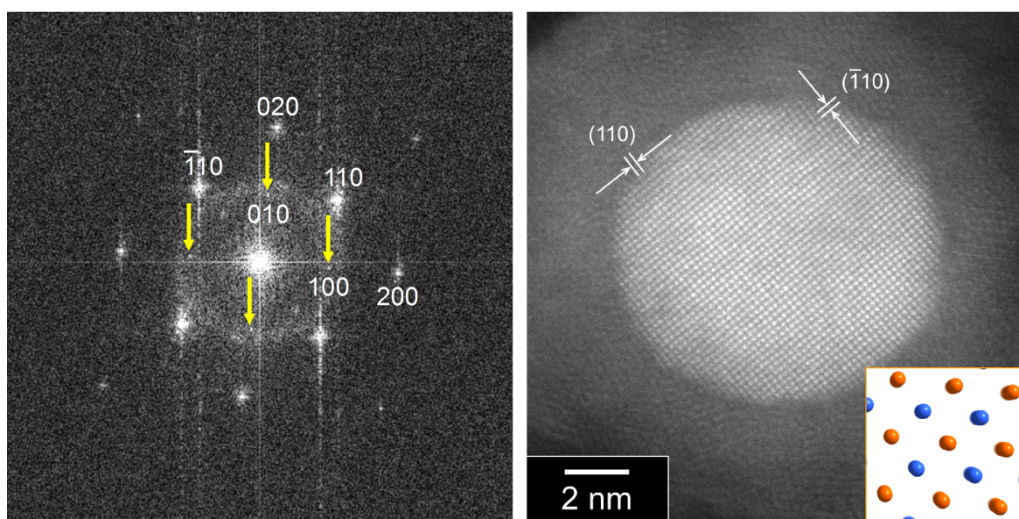

**Fig. S14** (left) A magnified FFT image of (right) the HR-STEM image of  $\text{FeCo}^{3000}$ . The yellow arrows indicate the characteristic spots of ordered B2 structure (e.g. (100) plane).



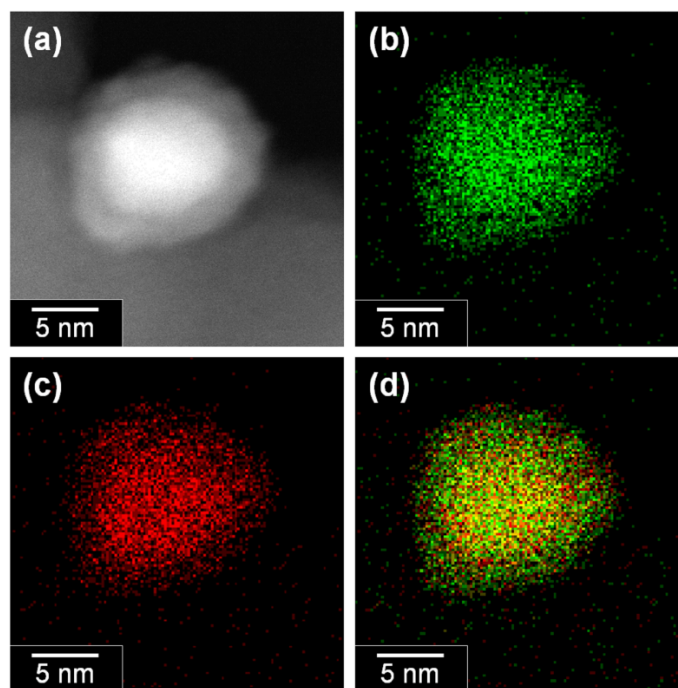

**Fig. S15** (a) HAADF–STEM image of a nanoparticle of  $\text{FeCo}^{5000}$  after hydrogen treatment at 800 °C under  $\text{H}_2/\text{Ar}$  mixed gas flow. STEM–EDX map of (b) Fe-K and (c) Co-K signals. (d) overlap image of Fe-K and Co-K signals. Green and red correspond to Fe-K and Co-K signals, respectively.

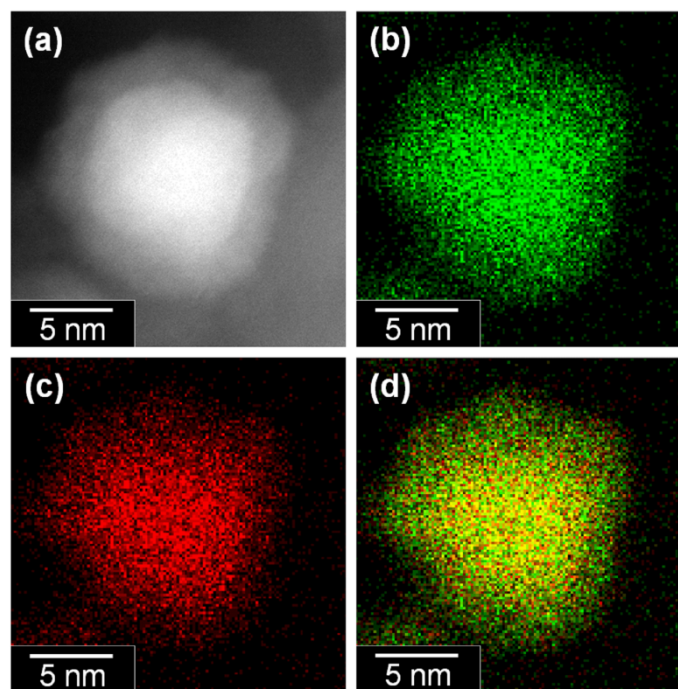

**Fig. S16** (a) HAADF–STEM image of a nanoparticle of  $\text{FeCo}^{3000}$  after hydrogen treatment at 800 °C under  $\text{H}_2/\text{Ar}$  mixed gas flow. STEM–EDX map of (b) Fe-K and (c) Co-K signals. (d) overlap image of Fe-K and Co-K signals. Green and red correspond to Fe-K and Co-K signals, respectively.

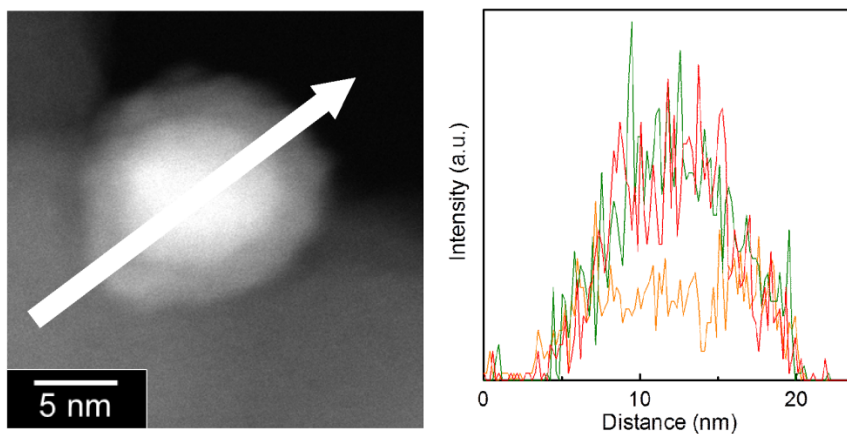

**Fig. S17** A line profile of EDX signals of Fe-K, Co-K, and O-K peaks of  $\text{FeCo}^{5000}$  after hydrogen treatment at 800 °C under  $\text{H}_2/\text{Ar}$  mixed gas flow. Green, red, and orange correspond to Fe-K, Co-K, and O-K signals, respectively.

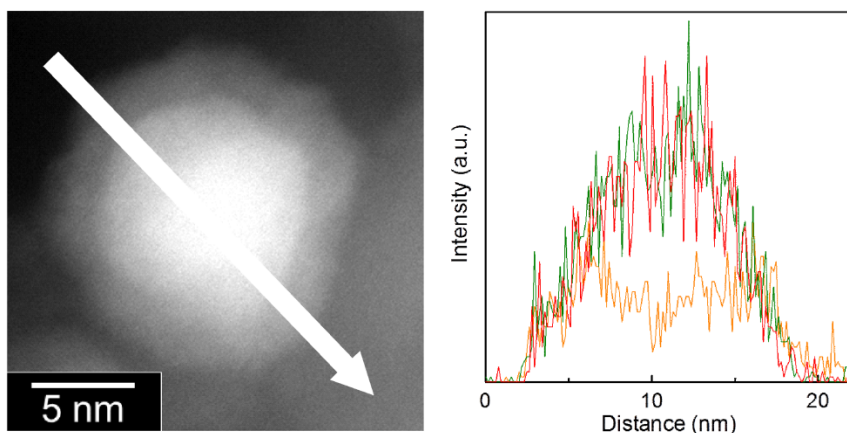

**Fig. S18** A line profile of EDX signals of Fe-K, Co-K, and O-K peaks of  $\text{FeCo}^{30000}$  after hydrogen treatment at 800 °C under  $\text{H}_2/\text{Ar}$  mixed gas flow. Green, red, and orange correspond to Fe-K, Co-K, and O-K signals, respectively.
